# Supplementary material for: Preparing for selection success: Socio‐demographic differences in opportunities and obstacles
Source: PubMed Central journal article supplement — Med Educ. 2022 Apr 25;56(9):922–35. doi: 10.1111/medu.14811 (PMC9544416; doi:10.1111/medu.14811), 2022-04-25
Supplement: MEDU-56-922-s002.pdf [file MEDU-56-922-s002.pdf]

# MAPS study version 3

---

## Page 1: MAPS: Medicine Applicant Preparation Study

Thank you for taking the time to complete this questionnaire. Your opinion is very important, because you have firsthand experience of preparing to get into medical school. This survey is part of a large-scale project looking at how applicants prepare. If you have any questions about the survey, please email [maps-survey@contacts.bham.ac.uk](mailto:maps-survey@contacts.bham.ac.uk).

We assume that if you complete this questionnaire, you are happy for your responses to be used in our research. It should take about 15-20 minutes to complete.

Please be reassured that nothing you say here will have any influence on the outcome of your application, and this survey is completely independent of the admissions process.

The participant information sheet for the study can be found here:

[https://static.onlinesurveys.ac.uk/media/account/208/survey/381868/question/information\\_sheet\\_\\_maps\\_survey.docx](https://static.onlinesurveys.ac.uk/media/account/208/survey/381868/question/information_sheet__maps_survey.docx)

## Page 2: General Preparation for Application

Please tick the response that best describes your experience of preparing to apply to medical school. Some of the questions may ask you to write a short sentence explaining your choice.

Please tell us about the types of work experience you did, and how often

|                                    | Please tick the option which best describes the duration that you did this type of work experience. * <i>Required</i> |                       |                       |                       |                       |
|------------------------------------|-----------------------------------------------------------------------------------------------------------------------|-----------------------|-----------------------|-----------------------|-----------------------|
|                                    | Never                                                                                                                 | 1-2 days              | 3-5 days              | 6-10 days             | more than 10 days     |
| Hospital experience (shadowing)    | <input type="radio"/>                                                                                                 | <input type="radio"/> | <input type="radio"/> | <input type="radio"/> | <input type="radio"/> |
| Hospital experience (volunteering) | <input type="radio"/>                                                                                                 | <input type="radio"/> | <input type="radio"/> | <input type="radio"/> | <input type="radio"/> |
| Hospital experience (paid)         | <input type="radio"/>                                                                                                 | <input type="radio"/> | <input type="radio"/> | <input type="radio"/> | <input type="radio"/> |
| GP experience (shadowing)          | <input type="radio"/>                                                                                                 | <input type="radio"/> | <input type="radio"/> | <input type="radio"/> | <input type="radio"/> |
| GP experience (volunteering)       | <input type="radio"/>                                                                                                 | <input type="radio"/> | <input type="radio"/> | <input type="radio"/> | <input type="radio"/> |
| GP experience (paid)               | <input type="radio"/>                                                                                                 | <input type="radio"/> | <input type="radio"/> | <input type="radio"/> | <input type="radio"/> |

If you'd like to tell us about additional or other types of work experience, please do so below:

## Page 3: General Preparation for Application

This next question is about work experience or volunteering outside of the hospital or general practice environment. *Examples of a 'caring environment' could be care homes, or working with those with learning disabilities. 'Customer focused' could include working in a shop.*

|                                                | Please tick the option which best describes the duration that you did this type of work experience (in a customer or caring environment). * <i>Required</i> |                       |                       |                       |                       |
|------------------------------------------------|-------------------------------------------------------------------------------------------------------------------------------------------------------------|-----------------------|-----------------------|-----------------------|-----------------------|
|                                                | Never                                                                                                                                                       | 1-2 days              | 3-5 days              | 6-10 days             | more than 10 days     |
| Shadowing in a caring environment              | <input type="radio"/>                                                                                                                                       | <input type="radio"/> | <input type="radio"/> | <input type="radio"/> | <input type="radio"/> |
| Volunteering in a caring environment           | <input type="radio"/>                                                                                                                                       | <input type="radio"/> | <input type="radio"/> | <input type="radio"/> | <input type="radio"/> |
| Paid work in a caring environment              | <input type="radio"/>                                                                                                                                       | <input type="radio"/> | <input type="radio"/> | <input type="radio"/> | <input type="radio"/> |
| Shadowing in a customer-focused environment    | <input type="radio"/>                                                                                                                                       | <input type="radio"/> | <input type="radio"/> | <input type="radio"/> | <input type="radio"/> |
| Volunteering in a customer-focused environment | <input type="radio"/>                                                                                                                                       | <input type="radio"/> | <input type="radio"/> | <input type="radio"/> | <input type="radio"/> |
| Paid work in a customer-focused environment    | <input type="radio"/>                                                                                                                                       | <input type="radio"/> | <input type="radio"/> | <input type="radio"/> | <input type="radio"/> |

If you'd like to tell us about additional or other types of experience in a customer or caring environment, please do so below:

Please select the response which best fits your work experience:

Please select the option that best fits your overall impression of arranging each aspect of work experience (*'Obstacles' relates to difficulties in arranging or accessing the activity: such as its cost or its availability*) \* *Required*

|                                                   | NO, I didn't consider it/know about it | NO, the obstacles were too great | NO, for other reasons | YES, but there were considerable obstacles | YES, and the obstacles were not considerable | Other                 |
|---------------------------------------------------|----------------------------------------|----------------------------------|-----------------------|--------------------------------------------|----------------------------------------------|-----------------------|
| Hospital work experience                          | <input type="radio"/>                  | <input type="radio"/>            | <input type="radio"/> | <input type="radio"/>                      | <input type="radio"/>                        | <input type="radio"/> |
| GP work experience                                | <input type="radio"/>                  | <input type="radio"/>            | <input type="radio"/> | <input type="radio"/>                      | <input type="radio"/>                        | <input type="radio"/> |
| Work experience in a caring environment           | <input type="radio"/>                  | <input type="radio"/>            | <input type="radio"/> | <input type="radio"/>                      | <input type="radio"/>                        | <input type="radio"/> |
| Work experience in a customer-focused environment | <input type="radio"/>                  | <input type="radio"/>            | <input type="radio"/> | <input type="radio"/>                      | <input type="radio"/>                        | <input type="radio"/> |

If you selected "other", or if you faced particular challenges in arranging work experience, tell us about them here:

## Page 4: General Preparation for Application

Applicants have told us about other general ways that they prepare for medical school selection. *Please select the response that best fits your experience:*

|                                                          | Please select the option that best fits your experience ( <i>'Obstacles' relates to difficulties in arranging or accessing the activity: such as its cost or its availability</i> ) * <i>Required</i> |                                  |                       |                                            |                                              |                       |
|----------------------------------------------------------|-------------------------------------------------------------------------------------------------------------------------------------------------------------------------------------------------------|----------------------------------|-----------------------|--------------------------------------------|----------------------------------------------|-----------------------|
|                                                          | NO, I didn't consider it/know about it                                                                                                                                                                | NO, the obstacles were too great | NO, for other reasons | YES, but there were considerable obstacles | YES, and the obstacles were not considerable | Other                 |
| Reading medical journals (e.g. Student BMJ, Lancet)      | <input type="radio"/>                                                                                                                                                                                 | <input type="radio"/>            | <input type="radio"/> | <input type="radio"/>                      | <input type="radio"/>                        | <input type="radio"/> |
| Watching/reading the news for healthcare related issues  | <input type="radio"/>                                                                                                                                                                                 | <input type="radio"/>            | <input type="radio"/> | <input type="radio"/>                      | <input type="radio"/>                        | <input type="radio"/> |
| Attending Medical Society at school (or equivalent)      | <input type="radio"/>                                                                                                                                                                                 | <input type="radio"/>            | <input type="radio"/> | <input type="radio"/>                      | <input type="radio"/>                        | <input type="radio"/> |
| Going on online forums (free)                            | <input type="radio"/>                                                                                                                                                                                 | <input type="radio"/>            | <input type="radio"/> | <input type="radio"/>                      | <input type="radio"/>                        | <input type="radio"/> |
| Going on university websites                             | <input type="radio"/>                                                                                                                                                                                 | <input type="radio"/>            | <input type="radio"/> | <input type="radio"/>                      | <input type="radio"/>                        | <input type="radio"/> |
| Attending courses (requiring a fee) e.g. MedLink, MedSim | <input type="radio"/>                                                                                                                                                                                 | <input type="radio"/>            | <input type="radio"/> | <input type="radio"/>                      | <input type="radio"/>                        | <input type="radio"/> |
| Attending courses at my local university                 | <input type="radio"/>                                                                                                                                                                                 | <input type="radio"/>            | <input type="radio"/> | <input type="radio"/>                      | <input type="radio"/>                        | <input type="radio"/> |
| Attending courses at my local hospital                   | <input type="radio"/>                                                                                                                                                                                 | <input type="radio"/>            | <input type="radio"/> | <input type="radio"/>                      | <input type="radio"/>                        | <input type="radio"/> |

If you selected "other", or if you faced particular challenges in your general preparation, tell us about them here:

## Page 5: Preparatory Activities for the UKCAT or BMAT exam

The next section of questions are about how you prepared for the UK CAT or BMAT exams.

For each activity, please select the response which best fits your experience:

|                                                        | Please select the option that best fits your experience ( <i>'Obstacles' relates to difficulties in arranging or accessing the activity: such as its cost or its availability</i> ) * Required |                                  |                       |                                            |                                              |                       |
|--------------------------------------------------------|------------------------------------------------------------------------------------------------------------------------------------------------------------------------------------------------|----------------------------------|-----------------------|--------------------------------------------|----------------------------------------------|-----------------------|
|                                                        | NO, I didn't consider it/know about it                                                                                                                                                         | NO, the obstacles were too great | NO, for other reasons | YES, but there were considerable obstacles | YES, and the obstacles were not considerable | Other                 |
| Use of preparation books                               | <input type="radio"/>                                                                                                                                                                          | <input type="radio"/>            | <input type="radio"/> | <input type="radio"/>                      | <input type="radio"/>                        | <input type="radio"/> |
| Use of websites about the UK CAT/BMAT (free)           | <input type="radio"/>                                                                                                                                                                          | <input type="radio"/>            | <input type="radio"/> | <input type="radio"/>                      | <input type="radio"/>                        | <input type="radio"/> |
| Online courses/tests (needing payment)                 | <input type="radio"/>                                                                                                                                                                          | <input type="radio"/>            | <input type="radio"/> | <input type="radio"/>                      | <input type="radio"/>                        | <input type="radio"/> |
| Paid for face to face courses                          | <input type="radio"/>                                                                                                                                                                          | <input type="radio"/>            | <input type="radio"/> | <input type="radio"/>                      | <input type="radio"/>                        | <input type="radio"/> |
| Paid for a tutor                                       | <input type="radio"/>                                                                                                                                                                          | <input type="radio"/>            | <input type="radio"/> | <input type="radio"/>                      | <input type="radio"/>                        | <input type="radio"/> |
| Discussed with people who'd done the tests in the past | <input type="radio"/>                                                                                                                                                                          | <input type="radio"/>            | <input type="radio"/> | <input type="radio"/>                      | <input type="radio"/>                        | <input type="radio"/> |
| School helped me to prepare                            | <input type="radio"/>                                                                                                                                                                          | <input type="radio"/>            | <input type="radio"/> | <input type="radio"/>                      | <input type="radio"/>                        | <input type="radio"/> |

If you selected "other", or if you faced particular challenges in preparing for admissions tests, tell us about them here:

## Page 6: Preparatory Activities for the Medical Interview

The next section of questions are about how you prepared for the Medical School Interview (either a panel/tutor interview, or Multiple Mini-Interview, MMI). Please select the response which best describes your experience of each preparation activity:

For each activity, please select the response which best fits your experience:

|                                                                                    | Please select the option that best fits your experience ( <i>'Obstacles' relates to difficulties in arranging or accessing the activity: such as its cost or its availability</i> ) * Required |                                  |                       |                                            |                                              |                       |
|------------------------------------------------------------------------------------|------------------------------------------------------------------------------------------------------------------------------------------------------------------------------------------------|----------------------------------|-----------------------|--------------------------------------------|----------------------------------------------|-----------------------|
|                                                                                    | NO, I didn't consider it/know about it                                                                                                                                                         | NO, the obstacles were too great | NO, for other reasons | YES, but there were considerable obstacles | YES, and the obstacles were not considerable | Other                 |
| Use of preparation books                                                           | <input type="radio"/>                                                                                                                                                                          | <input type="radio"/>            | <input type="radio"/> | <input type="radio"/>                      | <input type="radio"/>                        | <input type="radio"/> |
| Online courses/mock stations (free)                                                | <input type="radio"/>                                                                                                                                                                          | <input type="radio"/>            | <input type="radio"/> | <input type="radio"/>                      | <input type="radio"/>                        | <input type="radio"/> |
| Online courses/mock stations (needing payment)                                     | <input type="radio"/>                                                                                                                                                                          | <input type="radio"/>            | <input type="radio"/> | <input type="radio"/>                      | <input type="radio"/>                        | <input type="radio"/> |
| Paid for face to face courses                                                      | <input type="radio"/>                                                                                                                                                                          | <input type="radio"/>            | <input type="radio"/> | <input type="radio"/>                      | <input type="radio"/>                        | <input type="radio"/> |
| Paid for a tutor                                                                   | <input type="radio"/>                                                                                                                                                                          | <input type="radio"/>            | <input type="radio"/> | <input type="radio"/>                      | <input type="radio"/>                        | <input type="radio"/> |
| Attended a formal mock interview preparation course (run by school)                | <input type="radio"/>                                                                                                                                                                          | <input type="radio"/>            | <input type="radio"/> | <input type="radio"/>                      | <input type="radio"/>                        | <input type="radio"/> |
| Attended a formal mock interview preparation course (in local university/hospital) | <input type="radio"/>                                                                                                                                                                          | <input type="radio"/>            | <input type="radio"/> | <input type="radio"/>                      | <input type="radio"/>                        | <input type="radio"/> |
| Discussed with people who'd done interviews in the past                            | <input type="radio"/>                                                                                                                                                                          | <input type="radio"/>            | <input type="radio"/> | <input type="radio"/>                      | <input type="radio"/>                        | <input type="radio"/> |
| Practised interviews with others (family or friends)                               | <input type="radio"/>                                                                                                                                                                          | <input type="radio"/>            | <input type="radio"/> | <input type="radio"/>                      | <input type="radio"/>                        | <input type="radio"/> |
| School helped me to prepare                                                        | <input type="radio"/>                                                                                                                                                                          | <input type="radio"/>            | <input type="radio"/> | <input type="radio"/>                      | <input type="radio"/>                        | <input type="radio"/> |

If you selected "other", or if you faced particular challenges in preparing for admissions interviews, tell us about them here:



## Page 7: Your thoughts

If there are other ways in which you prepared for applying to Medical School, please specify below.

What do you believe is the biggest challenge you have faced in preparing to apply for medical school?

**Please tick if you received the following help/guidance towards any of the stages of your medical school application (including UK CAT/BMAT, and Medical school interviews) (tick all that apply)**

- School staff
- Family members (who are not doctors or healthcare professionals)
- Family members (who are doctors)
- Family members (who are not doctors, but other health professionals)
- Family friends (who are doctors or other types of health professionals)
- Paid tutor help
- Friends (who are also applying to medical school)
- Other

If you selected Other, please specify:

Did you move schools to help improve your chances of getting into medical school?

- Yes
- No

Some applicants have told us that they applied strategically to those medical schools where they thought they

had a better chance of getting in (based on their GCSE's and Admissions test scores). Is this true of your choices of university?

- No, I didn't consider this
- No, but I considered this
- Yes, this did influence my decision (but other factors were more important)
- Yes, this was the most important factor in my decision

## Page 8: About You

This next section is very short, and asks for some basic information about you.

**It is also important to know a little more about you so that we can assess the influence of preparation. We will therefore review your progress in the selection process at the University of Birmingham. Once we have linked this information with your survey responses, we will remove any identifying information so that all analyses will be anonymous.**

If you consent for us to link the information you provide here with your outcomes in medical school selection at other universities, please tick the box below: *By ticking this box, you will be helping us to consider more generally how preparation impacts medical school selection*

Yes

Have you attended/completed any of the following selection activities already? This includes those undertaken at other institutions (not just the University of Birmingham). Please tick any that apply.

- BMAT
- MMI (Multiple Mini-Interview)
- Panel interview
- Tutor-style interview (led by 1-2 tutors, usually from a college within a university)
- Other

If you selected Other, please specify:

Gender

Male

- Female
- Prefer not to say

Country of application

- UK
- European Union (or EEA)
- Rest of World

Ethnic background

- White: English/Welsh/Scottish/Northern Irish/British
- White: Irish
- White: Gypsy or Irish Traveller
- White: Any other White background, please describe below
- Mixed/Multiple Ethnic Groups: White and Black Caribbean
- Mixed/Multiple Ethnic Groups: White and Black African
- Mixed/Multiple Ethnic Groups: White and Asian
- Mixed/Multiple Ethnic Groups: Any other Mixed/Multiple Ethnic Background, please describe below:
- Asian/Asian British: Indian
- Asian/Asian British: Pakistani
- Asian/Asian British: Bangladeshi
- Asian/Asian British: Chinese
- Any other Asian background, please describe below
- Black/African/Caribbean/Black British: African
- Black/African/Caribbean/Black British: Caribbean
- Any other Black/African/Caribbean background, please describe below
- Other ethnic group: Arab
- Any other ethnic group, please describe below:
- If you have chosen "other", please describe here:
- Prefer not to say

If you selected Other, please specify:

Current Educational status

- Studying for A-Levels or equivalent
- Completed A-Levels or equivalent in 2018 or earlier
- In final year of an undergraduate degree programme
- Completed an undergraduate degree in 2018 or earlier
- Prefer not to say
- Other

If you selected Other, please specify:

Type of school attended for A-Levels or equivalent

- State school, non selective (non-selective, non-fee paying)
- Sixth Form College (non-selective, non-fee paying)
- Further Education College (non-selective, non-fee paying)
- State school, selective (selective, non-fee paying)
- Private/Independent (non-selective, fee-paying)
- Private/Independent (selective, fee-paying)
- Other

If you selected Other, please specify:

Have you participated in any of the following Wider Participation schemes? (please tick all that apply):

- Access to Birmingham (A2B)
- Routes to Professions (R2P)

A local university widening participation programme

Username for this BOS survey \* *Required*

What is your current postcode? (Where you spend most of your time)

## Page 9: Thank You

Thank you again for completing this questionnaire. If you subsequently decide to withdraw from the research, please email [maps-survey@contacts.bham.ac.uk](mailto:maps-survey@contacts.bham.ac.uk) with your name and UCAS ID number and your intention to withdraw.

---
